# Supplementary material
Source: Springer Nature journal article supplement (https://www.springermedizin.de/resource/supplementary/12913_2006_583_MOESM6_ESM.pdf/9535388)

Figure 5  
Geographical distribution of households willing to pay to avoid waiting lists for surgery or other hospital treatment

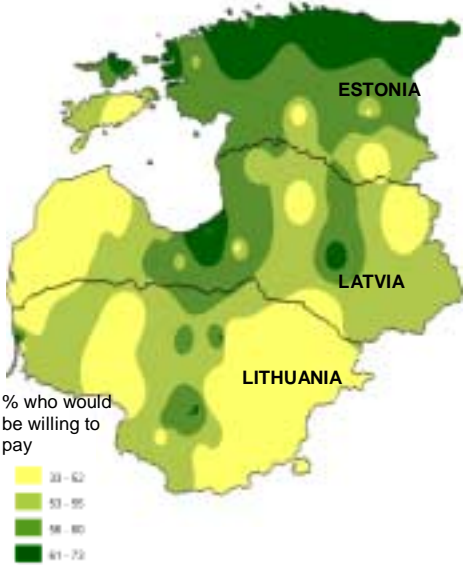

Supplement: MOESM6 [file 9535388]
